# Supplementary material for: Cycloaddition of CO2 with epoxides and esterification reactions using the porous redox catalyst Co-POM@MIL-101(Cr)
Source: Royal Society of Chemistry journal article supplement (doi:10.1039/c9nj02607j), 2019-01-01
Supplement: c9nj02607j1.pdf [file c9nj02607j1.pdf]

*Electronic Supplementary Information (ESI†)*

*for*

**Cycloaddition of CO<sub>2</sub> with epoxides and esterification reactions using the porous redox catalyst Co-POM@MIL-101(Cr)**

Afsaneh Marandi,<sup>a</sup> Mehrnaz Bahadori,<sup>a</sup> Shahram Tangestaninejad,<sup>\*a</sup> Majid Moghadam,<sup>\*a</sup> Valiollah Mirkhani,<sup>\*a</sup> Iraj Mohammadpoor-Baltork,<sup>a</sup> Robert Frohnhoven,<sup>b</sup> Sanjay Mathur,<sup>b</sup> Aaron Sandleben,<sup>b</sup> Axel Klein.<sup>b</sup>

<sup>a</sup> Department of Chemistry, Catalysis Division, University of Isfahan, Isfahan 81746-73441, Iran

<sup>b</sup> Department of Chemistry, University of Cologne, Greinstrasse 6, 50939 Köln, Germany

**Contents**

*1. Synthesis of MIL-101(Cr)*

*2. Supporting Figures*

**Fig. S1.** (A) SEM image and (B) TEM image of Co-POM@MIL-101(3)

**Fig. S2.** SEM-EDX mapping of Co-POM@MIL-101(3)

**Fig. S3.** XPS high-resolution spectra of the W 4f / W 5p region for Co-POM@MIL-101(3) and Co-POM@MIL-101(5)

**Fig. S4.** XPS high-resolution spectra of the O 1s region for Co-POM@MIL-101(3) and Co-POM@MIL-101(5)

**Fig. S5.** XPS high-resolution spectra of the C 1s / K 2p region for Co-POM@MIL101(3) and Co-POM@MIL-101(5)

**Fig. S6.** N<sub>2</sub> adsorption isotherms of Co-POM@MIL-101 containing various amounts of Co-POM

**Fig. S7.** CO<sub>2</sub> absorption isotherms for MIL-101(Cr) and Co-POM@MIL-101(3)

**Fig. S8.** XRD patterns of (a) MIL-101(Cr), (b) Co-POM@MIL-101(3), (c) reused Co-POM@MIL-101(3)

*3. Supporting Tables*

**Table S1.** Cycloaddition of CO<sub>2</sub> with styrene epoxide catalyzed by Co-POM@MIL-101(3) - optimization of the reaction time

**Table S2.** Cycloaddition of CO<sub>2</sub> with styrene epoxide catalyzed by Co-POM@MIL-101(3) - optimization of the temperature

**Table S3.** Cycloaddition of CO<sub>2</sub> with styrene epoxide catalyzed by Co-POM@MIL-101(3) - optimization of the amount of catalyst

**Table S4.** The effect of the initial POM amount in the catalytic activity of the Co-POM@MIL-101 catalysts in the esterification of acetic acid with benzyl alcohol

**Table S5.** Esterification of acetic acid with alcohol - optimization of the catalyst amount

**Table S6.** Esterification of acetic acid with alcohol - optimization of the temperature

## 1. Synthesis of MIL-101(Cr)

MIL-101(Cr) samples were synthesized hydrothermally according to a formerly reported method by Lev Bromberg et al.<sup>1</sup> in the absence of HF. In this method,  $\text{Cr}(\text{NO}_3)_3 \cdot 9\text{H}_2\text{O}$  (2.0 g, 5 mmol), terephthalic acid (0.83 g, 5 mmol), and deionized water (20 mL) were mixed, then the mixture was put in a Teflon lined autoclave reactor and kept in an oven at 218 °C for 18 h without stirring. After the synthesis and cool down to room temperature, the green raw product was separated by centrifugation and washed with water, ethanol, and acetone, and then dried and activated at 100 °C overnight under vacuum.

## 2. Supporting Figures

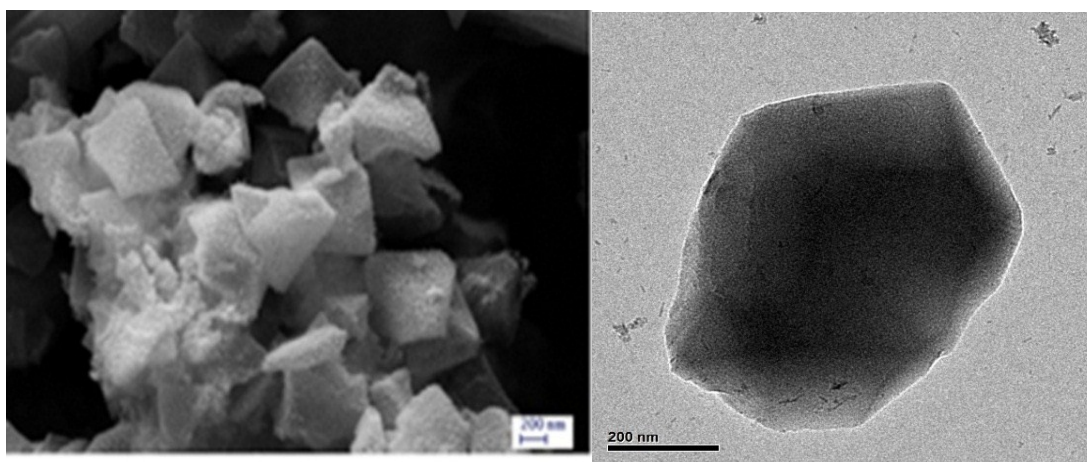

**Fig. S1.** Left: SEM image and right: TEM image of Co-POM@MIL-101(3).

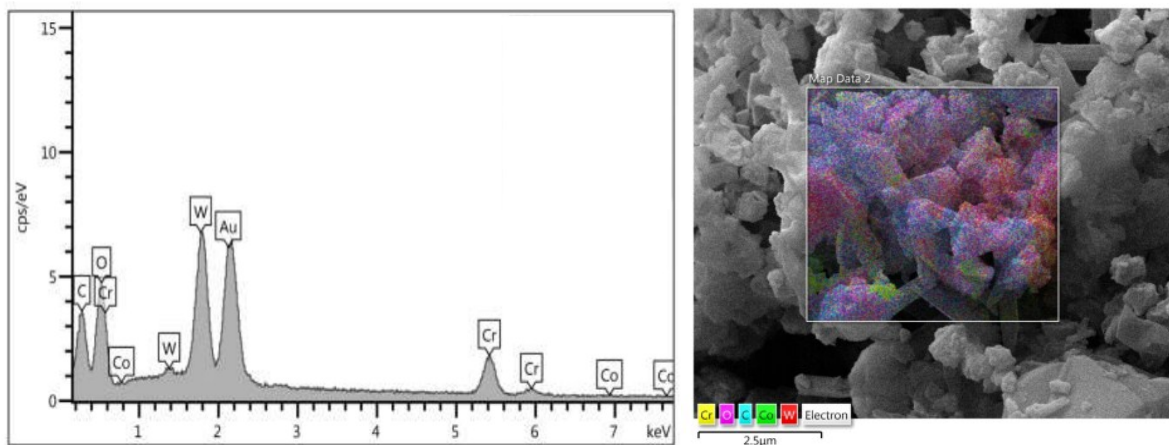

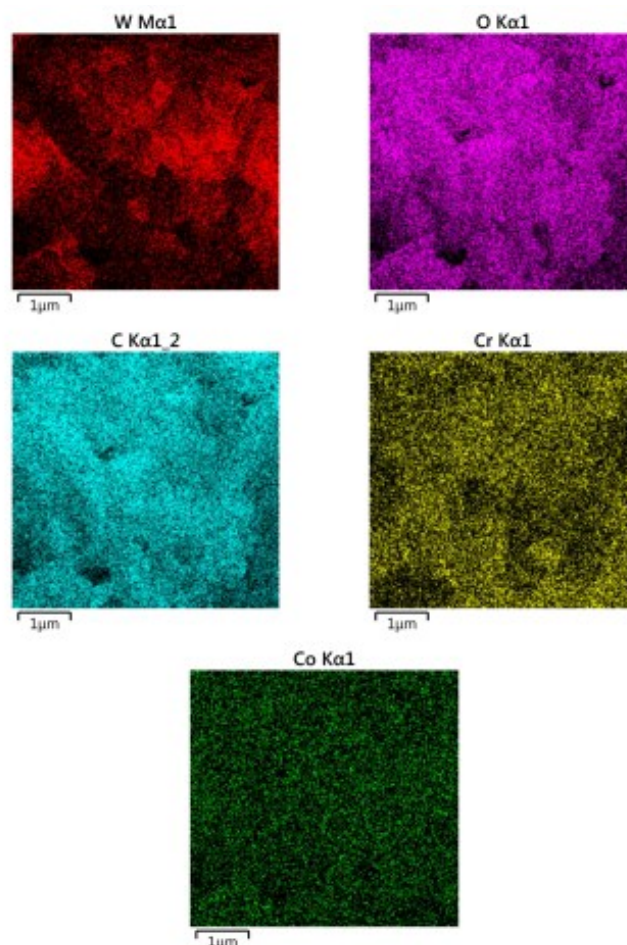

**Fig. S2.** SEM-EDX mapping of Co-POM@MIL-101(3) (sample holder = Au). The following elemental analysis was obtained: C 33.9(3) wt%, W 27.9(2) wt%, O 25.5(3) wt%, Cr 12.5(1) wt%, Co 0.1(1) wt%.

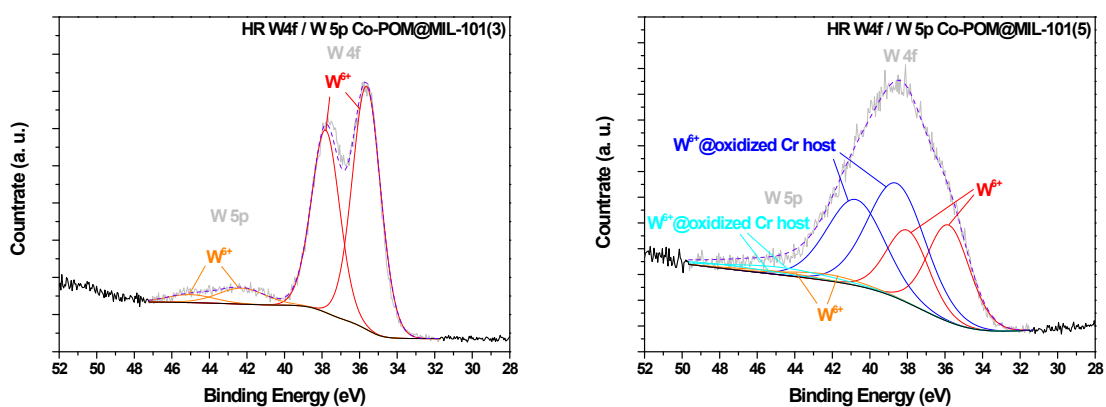

**Fig. S3.** XPS high-resolution spectra of the W 4f / W 5p region for Co-POM@MIL-101(3) (left) and Co-POM@MIL101(5) (right).

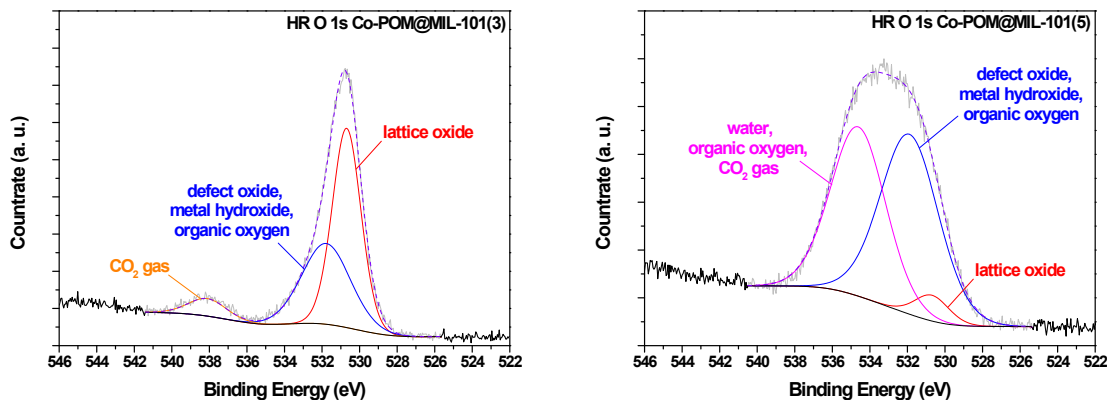

**Fig. S4.** XPS high-resolution spectra of the O 1s region for Co-POM@MIL-101(3) (left) and Co-POM@MIL-101(5) (right).

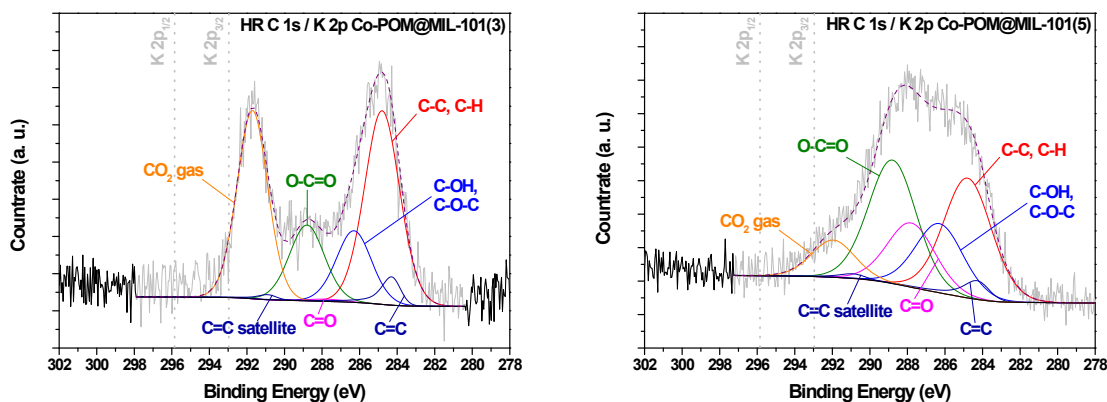

**Fig. S5.** XPS high-resolution spectra of the C 1s / K 2p region for Co-POM@MIL-101(3) (left) and Co-POM@MIL-101(5) (right).

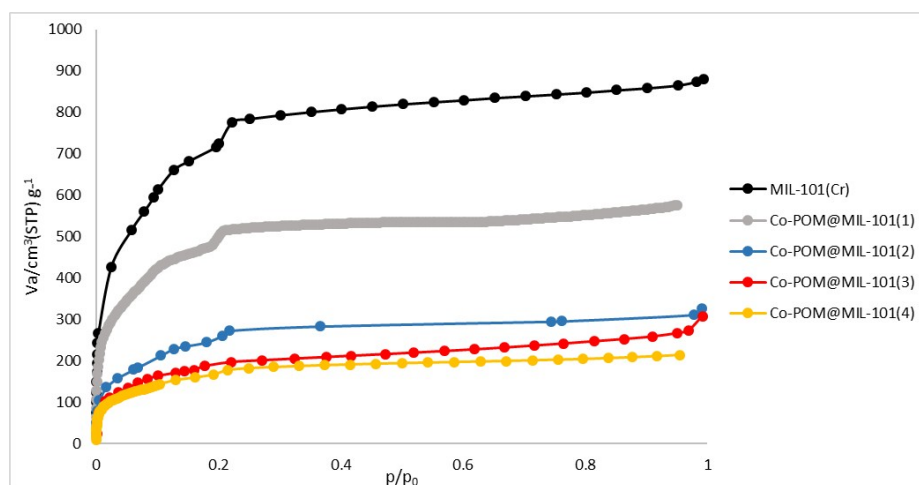

**Fig. S6.** N<sub>2</sub> adsorption isotherms of Co-POM@MIL-101 containing various amounts of Co-POM (0 g = MIL-101(Cr), 0.4 g = Co-POM@MIL-101(1), 0.8 g = -(2), 1.0 g = -(3), and 2.0 g = -(4)).

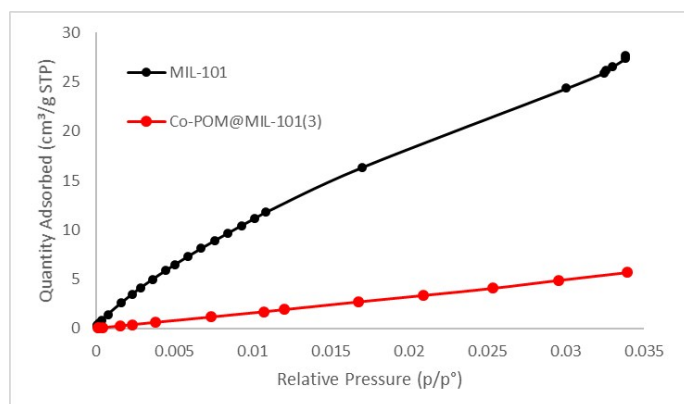

**Fig. S7.** CO<sub>2</sub> absorption isotherms for MIL-101(Cr) and Co-POM@MIL-101(3)

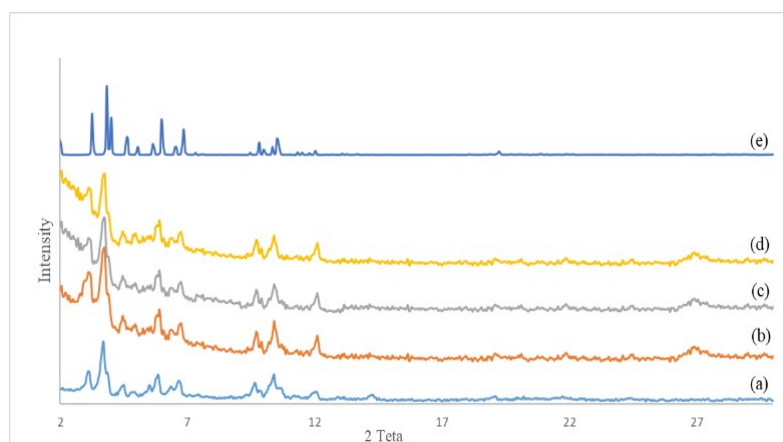

**Fig. S8.** XRD patterns of (a) MIL-101(Cr), (b) Co-POM@MIL-101(3), (c) reused Co-POM@MIL-101(3) after five runs of cycloaddition of CO<sub>2</sub> with styrene epoxide, and (d) reused Co-POM@MIL-101(3) after seven runs of esterification of acetic acid with benzyl alcohol, (e) simulated pattern of MIL-101(Cr).

### 3. Supporting Tables

**Table S1.** Cycloaddition of CO<sub>2</sub> with styrene epoxide catalyzed by Co-POM@ MIL-101(3) - optimization of reaction time.<sup>a</sup>

| entry | time (h) | conversion <sup>b</sup> (%) | selectivity <sup>b</sup> (%) | TOF <sup>c</sup> (h <sup>-1</sup> ) |
|-------|----------|-----------------------------|------------------------------|-------------------------------------|
| 1     | 5        | 88                          | 88                           | 1320                                |
| 2     | 4        | 88                          | 87                           | 1650                                |
| 3     | 3        | 89                          | 87                           | 2225                                |
| 4     | 2        | 88                          | 88                           | 3300                                |
| 5     | 1        | 42                          | 85                           | 3150                                |

<sup>a</sup> Reaction conditions: 15 mmol styrene epoxide, 200 mg catalyst, 1 mmol TBABr, P<sub>CO2</sub> = 20 bar, and T = 110 °C.

<sup>b</sup> Yields were determined by GC analysis.

<sup>c</sup> (Mol product/mol Co-POM)h<sup>-1</sup>

**Table S2.** Cycloaddition of CO<sub>2</sub> with styrene epoxide catalyzed by Co-POM@MIL-101(3) - optimization of temperature. <sup>a</sup>

| entry | <i>T</i> (°C) | conversion <sup>b</sup> (%) | selectivity <sup>b</sup> (%) |
|-------|---------------|-----------------------------|------------------------------|
| 1     | 130           | 79                          | 80                           |
| 2     | 110           | 88                          | 88                           |
| 3     | 90            | 87                          | 88                           |
| 4     | 70            | 55                          | 73                           |

<sup>a</sup> Reaction conditions: 15 mmol styrene epoxide, 200 mg catalyst, 1 mmol TBABr, P<sub>CO2</sub> = 20 bar, for 2 h.<sup>b</sup> Yields were determined by GC analysis.**Table S3.** Cycloaddition of CO<sub>2</sub> with styrene epoxide catalyzed by Co-POM@MIL-101(3) - optimization of the amount of catalyst <sup>a</sup>

| entry | Co-POM@MIL-101(3) (mg) | conversion <sup>b</sup> (%) | selectivity <sup>b</sup> (%) |
|-------|------------------------|-----------------------------|------------------------------|
| 1     | 50                     | 40                          | 83                           |
| 2     | 100                    | 52                          | 84                           |
| 3     | 150                    | 64                          | 88                           |
| 4     | 200                    | 88                          | 88                           |
| 5     | 250                    | 88                          | 85                           |

<sup>a</sup> Reaction conditions: 15 mmol styrene epoxide, 1 mmol TBABr, *T* = 90 °C and P<sub>CO2</sub> = 20 bar for 2 h.<sup>b</sup> Yields were determined by GC analysis.**Table S4.** The effect of initial POM amount in the catalytic activity of the Co-POM@MIL-101 catalysts in the esterification of acetic acid with benzyl alcohol. <sup>a</sup>

| sample            | Co-POM (g) | yield. <sup>b</sup> (%) | time (min) | TOF <sup>c</sup> (h <sup>-1</sup> ) | Co-POM loading (mmol/g) <sup>d</sup> |
|-------------------|------------|-------------------------|------------|-------------------------------------|--------------------------------------|
| MIL-101           | 0          | traces                  | 60         | -                                   | -                                    |
| Co-POM@MIL-101(1) | 0.4        | 60                      | 40         | 8950                                | 0.0050                               |
| Co-POM@MIL-101(2) | 0.8        | 78                      | 30         | 9200                                | 0.0084                               |
| Co-POM@MIL-101(3) | 1          | 84                      | 25         | 10500                               | 0.0100                               |
| Co-POM@MIL-101(4) | 2          | 60                      | 25         | 5800                                | 0.0130                               |

<sup>a</sup> Reaction conditions: 5 mmol acetic acid, 55 mmol alcohol, 100 mg catalyst, *T* = 100 °C).<sup>b</sup> Yields were determined by GC analysis.<sup>c</sup> (Mol product/mol Co-POM)h<sup>-1</sup>.<sup>d</sup> Determined by ICP.**Table S5.** Esterification of acetic acid with alcohol - optimization of the catalyst amount. <sup>a</sup>

| entry | Co-POM@MIL-101(3) (g) | time (min) | yield. <sup>b</sup> (%) | TOF <sup>c</sup> (h <sup>-1</sup> ) |
|-------|-----------------------|------------|-------------------------|-------------------------------------|
| 1     | 0                     | 60         | Negligible              | -                                   |
| 2     | 50                    | 45         | 40                      | 5300                                |
| 3     | 100                   | 25         | 84                      | 10500                               |
| 4     | 150                   | 20         | 84                      | 8480                                |

<sup>a</sup> Reaction conditions: 5 mmol acetic acid, 55 mmol benzyl alcohol, Co-POM@MIL-101(3), *T* = 100 °C.<sup>b</sup> GC yield based on acid.<sup>c</sup> (Mol product/mol Co-POM)h<sup>-1</sup>.

**Table S6.** Esterification of acetic acid with alcohol - optimization of the temperature. <sup>a</sup>

| entry | <i>T</i> (°C)    | yield. <sup>b</sup> (%) |
|-------|------------------|-------------------------|
| 1     | room temperature | 0                       |
| 2     | 50               | 55                      |
| 3     | 70               | 84                      |
| 4     | 100              | 84                      |

<sup>a</sup> Reaction conditions: 5 mmol acetic acid, 55 mmol benzyl alcohol, 100 mg Co-POM@MIL-101(3), 25 min.

<sup>b</sup> GC yield based on epoxide.

## References

1. L. Bromberg, Y. Diao, H. Wu, S. A. Speakman and T. A. Hatton, *Chem.Mater.*, 2012, **24**, 1664-1675.
